# Supplementary material for: Retrospective follow-up analysis of the transcriptomic patterns of cytokines, cytokine receptors and chemokines at preconception and during pregnancy, in women with post-partum depression
Source: PubMed Central journal article supplement — Exp Ther Med. 2019 Jul 12;18(3):2055–62. doi: 10.3892/etm.2019.7774 (PMC6676209; doi:10.3892/etm.2019.7774), 2019-07-12

Figure S1. Time-course expression levels of genes with significant differences in expression at preconception between the euthymic patients and patients with PPD. PPD, post-partum depression.

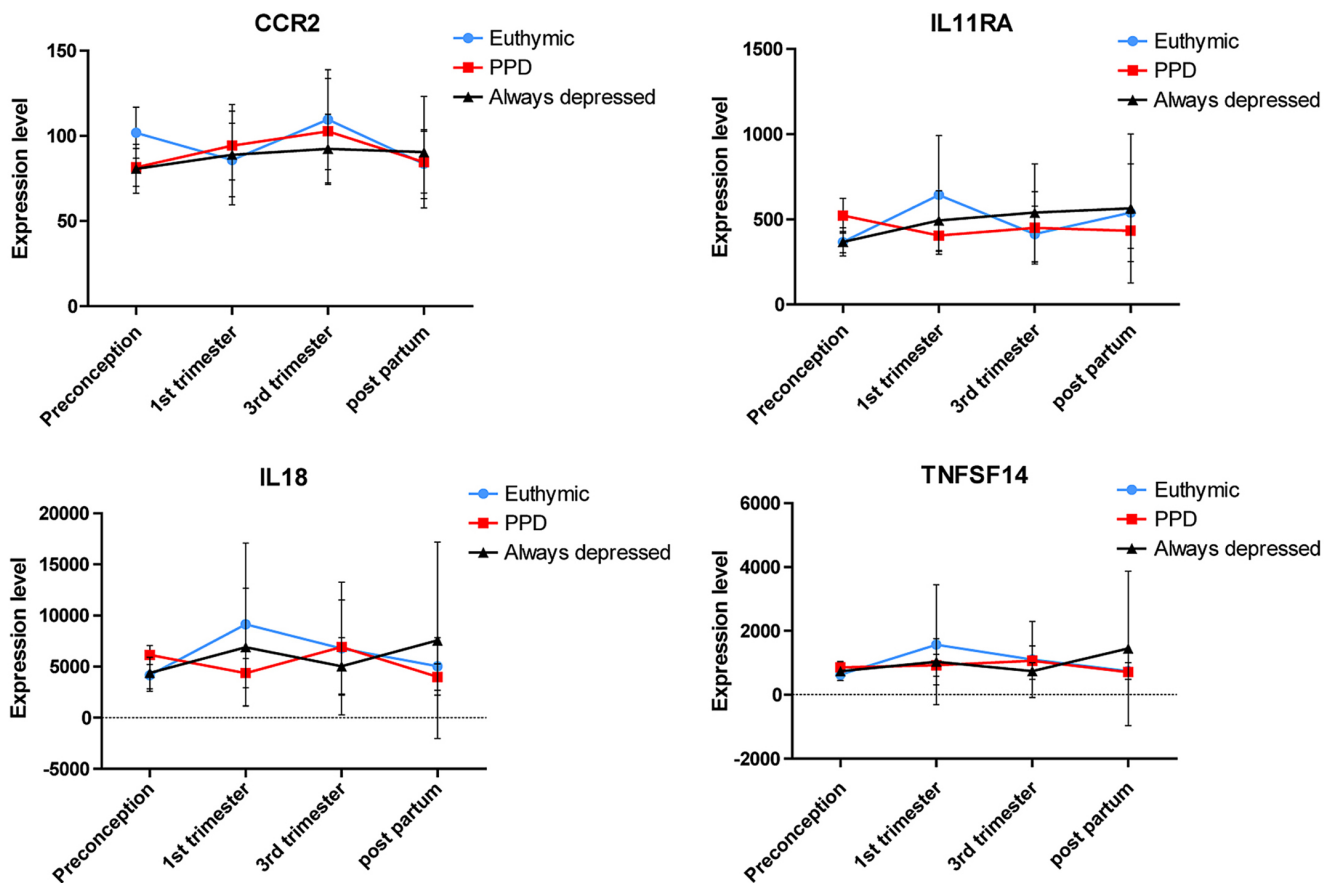

Figure S2. Time-course expression levels of genes with significant differences in expression at the 1st trimester of pregnancy between the euthymic patients and patients with PPD. PPD, post-partum depression.

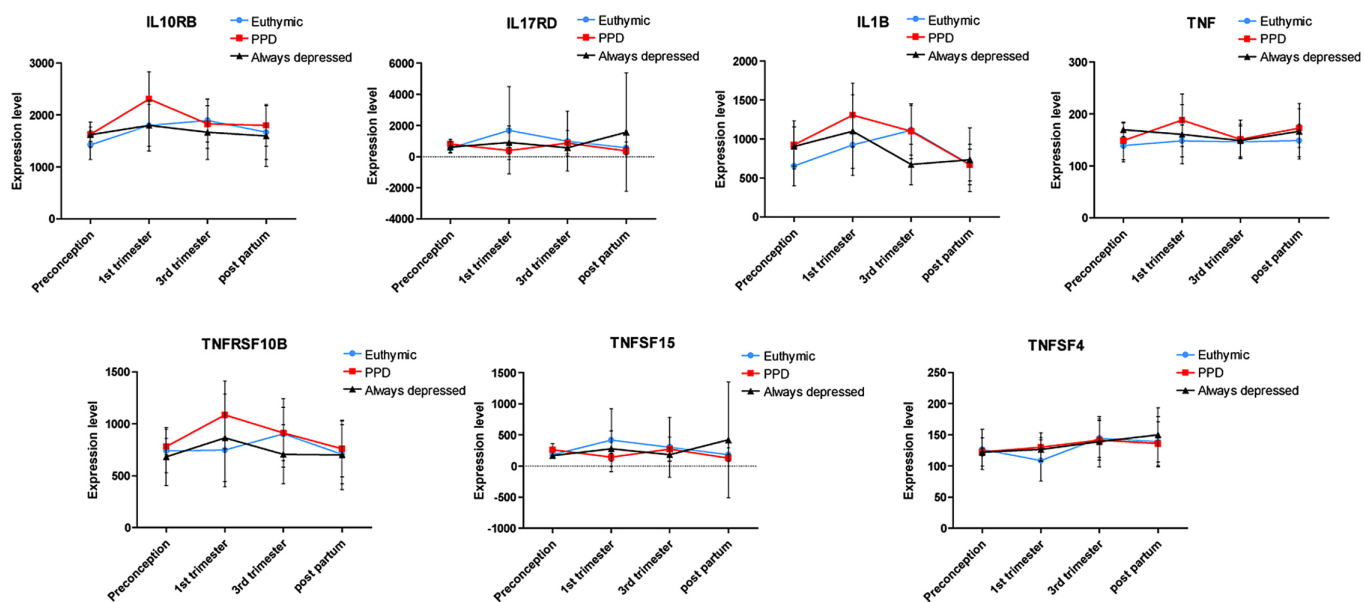

Figure S3. Time-course expression levels of genes with significant differences in expression at the 3rd trimester of pregnancy between the euthymic patients and patients with PPD. PPD, post-partum depression.

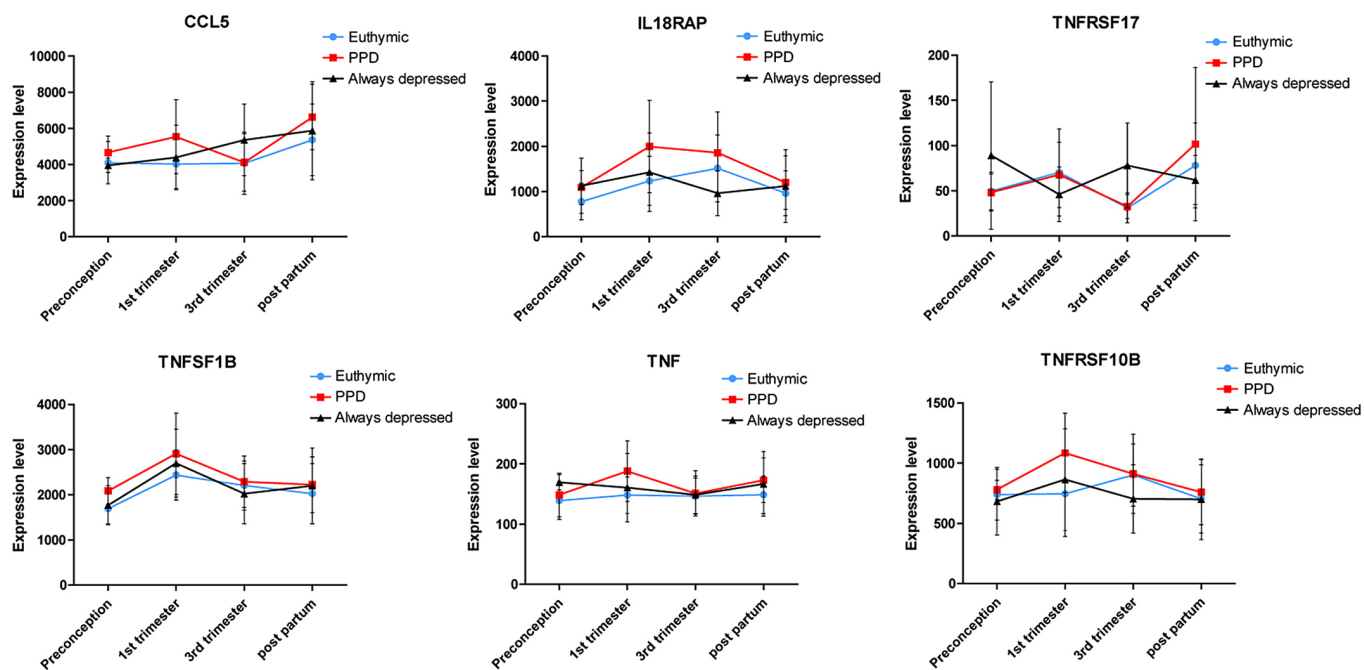

Supplement: Supplementary_Data.pdf [file Supplementary_Data.pdf]
